# Supplementary material for: HDAC6 regulates IL-17 expression in T lymphocytes: implications for HDAC6-targeted therapies
Source: PubMed Central journal article supplement — Theranostics. 2017 Feb 23;7(4):1002–9. doi: 10.7150/thno.17615 (PMC5381261; doi:10.7150/thno.17615), 2017-02-23

## Supplementary Figures

**Figure S1.** Effects of tubastatin A on the expression of IL-17 in EL4 cells. EL4 cells were treated with 0, 2, or 4  $\mu\text{M}$  tubastatin A for 4 hours and incubated with PMA and ionomycin for 0, 12, or 18 hours. IL-17A (A) and IL-17F (B) mRNA levels were then analyzed by qRT-PCR. Data are representative of three independent experiments. Error bars indicate mean  $\pm$  SEM. \* $p < 0.05$ ; \*\*\* $p < 0.001$ ; ns, not significant.

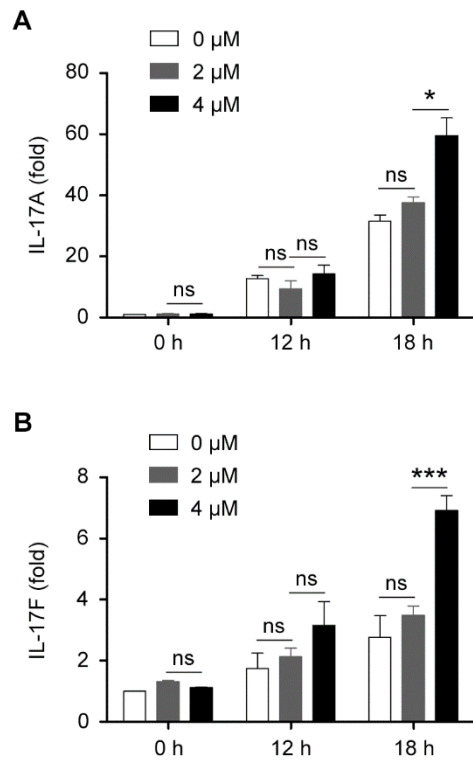

**Figure S2.** Effects of tubastatin A on the expression of IL-17-associated transcription factors in EL4 cells. EL4 cells were treated with DMSO or 2  $\mu$ M tubastatin A (TubA) for 4 hours and incubated with PMA and ionomycin for 0, 12, or 18 hours. Hes1 (A), SOX4 (B), and SOX13 (C) mRNA levels were then analyzed by qRT-PCR. Error bars indicate mean  $\pm$  SEM. ns, not significant.

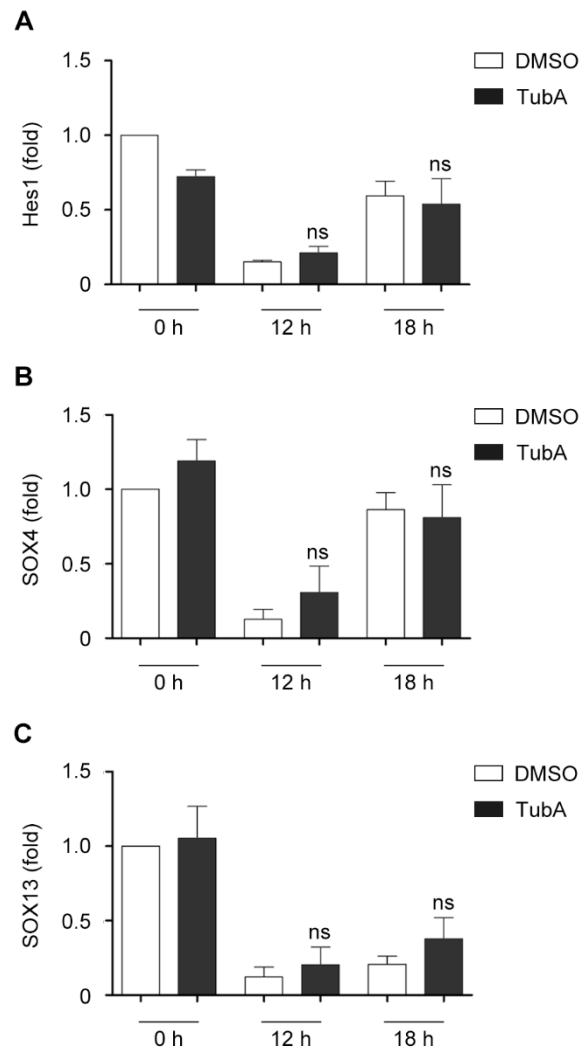

Supplement: thnov07p1002s1.pdf [file thnov07p1002s1.pdf]
